# Supplementary material for: Analysis of Circulating microRNA Signatures and Preeclampsia Development
Source: MDPI journal article supplement (doi:10.3390/cells10051003), 2021-04-24
Supplement: s1 [file s1]

---

- Supplementary Material -

## **Analysis of circulating microRNA signatures and preeclampsia development**

Margarita L Martinez-Fierro<sup>1\*</sup> and Idalia Garza-Veloz<sup>1</sup>

<sup>1</sup> Molecular Medicine Laboratory, Unidad Academica de Medicina Humana y Ciencias de la Salud. Universidad Autonoma de Zacatecas. Zacatecas, Mexico.

\*To whom the correspondence should be addressed.

Margarita L Martinez-Fierro. DSc.  
Unidad Academica de Medicina Humana y Ciencias de la Salud.  
Universidad Autonoma de Zacatecas.  
Carretera Zacatecas-Guadalajara Km.6. Ejido la Escondida.  
CP 98160, Zacatecas, Mex.  
Telephone: +52(492) 9256690 Ext/Fax number:4511.  
E-mail: margaritamf@uaz.edu.mx

**Table S1.** Comparison of the clinical data between the groups at the three follow-up time points

| Clinical finding                       | 12 WG             |                      | p value | 16 WG              |                      | P value | 20 WG              |                      | p value |
|----------------------------------------|-------------------|----------------------|---------|--------------------|----------------------|---------|--------------------|----------------------|---------|
|                                        | WWD-PE<br>(n = 6) | CONTROLS<br>(n = 18) |         | WWD-PE<br>(n = 10) | CONTROLS<br>(n = 18) |         | WWD-PE<br>(n = 14) | CONTROLS<br>(n = 18) |         |
| SBP (mmHg)                             | 113.3 ± 10.3      | 101.4 ± 12.3         | 0.052   | 102.2 ± 12.3       | 103.2 ± 10.9         | 0.841   | 102.7 ± 12.2       | 103.6 ± 11.5         | 0.786   |
| DBP (mmHg)                             | 63.3 ± 12.1       | 67.7 ± 16.2          | 0.561   | 62.2 ± 14.8        | 69.1 ± 11.1          | 0.215   | 58.7 ± 12.5        | 67.4 ± 10.4          | 0.05    |
| Glucose (mg/dl)                        | 78.0 ± 3.7        | 82.5 ± 9.2           | 0.732   | 82.3 ± 6.9         | 81.1 ± 11.0          | 0.796   | 75.9 ± 9.5         | 81.1 ± 11.0          | 0.223   |
| Urine proteins (mg/dl)                 | Negative          | Negative             | -       | Negative           | Negative             | -       | Negative           | Negative             | -       |
| Eritrocytes (x10 <sup>6</sup> /μl)     | 4.6 ± 0.3         | 4.9 ± 0.6            | 0.286   | 4.4 ± 0.5          | 4.7 ± 0.4            | 0.139   | 4.4 ± 0.2          | 4.5 ± 0.3            | 0.399   |
| Hemoglobine (g/dl)                     | 13.6 ± 1.0        | 14.6 ± 1.0           | 0.071   | 13.0 ± 1.4         | 14.2 ± 0.8           | 0.063   | 13.1 ± 0.7         | 13.6 ± 0.6           | 0.065   |
| Leucocyte count (x10 <sup>3</sup> /μl) | 8.5 ± 1.7         | 8.7 ± 1.6            | 0.827   | 9.2 ± 1.4          | 9.1 ± 2.1            | 0.898   | 8.8 ± 1.7          | 9.2 ± 1.9            | 0.603   |
| Total Cholesterol (mg/dl)              | 162.9 ± 49.7      | 180.6 ± 41.2         | 0.407   | 187.8 ± 57.8       | 184.6 ± 35           | 0.869   | 196.2 ± 52.9       | 208 ± 33.5           | 0.395   |
| HDL (mg/dl)                            | 62.4 ± 16.4       | 53.7 ± 10.4          | 0.153   | 67.9 ± 10.8        | 60.7 ± 10.7          | 0.142   | 65.7 ± 16.2        | 59.8 ± 10.0          | 0.232   |
| Triglycerides (mg/ml)                  | 102.1 ± 14.7      | 140.0 ± 43.3         | 0.15    | 110.1 ± 18.3       | 139.4 ± 38.6         | 0.057   | 130.6 ± 33.5       | 152.5 ± 28           | 0.057   |

Data are shown as the mean ± SD

**Table S2**– Differentially expressed circulating miRNAs between the WWD-PE and control groups during the pregnancy time points evaluated.

| Gestational Age | Target          | RQ    | RQ min | RQ max | p-value |
|-----------------|-----------------|-------|--------|--------|---------|
| 12 WG           | hsa-miR-628-3p  | 7.70  | 1.91   | 31.03  | 0.0200  |
|                 | hsa-miR-766-3p  | 2.80  | 1.93   | 4.07   | 0.0232  |
|                 | hsa-miR-323a-3p | 6.71  | 3.36   | 13.37  | 0.0246  |
| 16 WG           | hsa-miR-199a-3p | 4.24  | 3.13   | 5.74   | 0.0009  |
|                 | hsa-miR-584-5p  | 3.59  | 1.56   | 8.27   | 0.0025  |
|                 | hsa-miR-422a    | 5.06  | 2.68   | 9.55   | 0.0063  |
|                 | hsa-miR-411-5p  | 7.27  | 4.60   | 11.51  | 0.0074  |
|                 | hsa-miR-27b-3p  | 5.04  | 1.40   | 18.07  | 0.0104  |
|                 | hsa-miR-133a-3p | 0.46  | 0.23   | 0.93   | 0.0113  |
|                 | hsa-miR-573     | 1.92  | 0.79   | 4.67   | 0.0126  |
|                 | hsa-miR-142-3p  | 11.74 | 5.79   | 23.79  | 0.0142  |
|                 | hsa-miR-197-3p  | 0.30  | 0.11   | 0.80   | 0.0158  |
|                 | hsa-miR-221-3p  | 6.11  | 2.09   | 17.84  | 0.0174  |
|                 | hsa-miR-151a-3p | 2.35  | 0.88   | 6.27   | 0.0177  |
|                 | hsa-miR-34a-3p  | 8.43  | 4.37   | 16.24  | 0.0177  |
|                 | hsa-miR-892b    | 5.69  | 2.75   | 11.78  | 0.0213  |
|                 | hsa-miR-572     | 3.28  | 1.10   | 9.73   | 0.0228  |
|                 | hsa-miR-30e-3p  | 2.79  | 0.65   | 11.98  | 0.0248  |
|                 | hsa-miR-1247-5p | 4.44  | 3.42   | 5.75   | 0.0248  |
|                 | hsa-miR-126-5p  | 4.42  | 0.99   | 19.86  | 0.0249  |
|                 | hsa-miR-374a-5p | 4.39  | 1.82   | 10.56  | 0.0262  |
|                 | hsa-miR-664a-3p | 3.90  | 0.99   | 15.30  | 0.0278  |
|                 | hsa-miR-18b-5p  | 2.17  | 1.16   | 4.05   | 0.0280  |
|                 | hsa-miR-520c-3p | 2.37  | 1.21   | 4.67   | 0.0286  |
|                 | hsa-miR-28-5p   | 3.70  | 2.07   | 6.61   | 0.0304  |
|                 | hsa-miR-186-5p  | 4.24  | 1.28   | 14.09  | 0.0310  |
|                 | hsa-miR-28-3p   | 3.49  | 1.31   | 9.28   | 0.0319  |
|                 | hsa-miR-432-3p  | 1.95  | 1.29   | 2.92   | 0.0333  |
|                 | hsa-miR-146b-5p | 3.32  | 1.60   | 6.88   | 0.0333  |
|                 | hsa-miR-490-3p  | 7.57  | 1.83   | 31.30  | 0.0348  |
|                 | hsa-miR-126-3p  | 3.98  | 0.91   | 17.50  | 0.0366  |
|                 | hsa-miR-19b-3p  | 3.76  | 1.30   | 10.82  | 0.0385  |
|                 | hsa-miR-26b-3p  | 3.28  | 1.24   | 8.70   | 0.0408  |
|                 | hsa-miR-601     | 2.55  | 1.00   | 6.53   | 0.0409  |
|                 | hsa-miR-21-5p   | 8.27  | 1.85   | 36.93  | 0.0427  |

|                              |                  |       |       |       |        |
|------------------------------|------------------|-------|-------|-------|--------|
|                              | hsa-miR-151a-5p  | 3.56  | 1.02  | 12.47 | 0.0441 |
|                              | hsa-miR-146a-5p  | 2.02  | 0.56  | 7.25  | 0.0444 |
|                              | hsa-miR-361-5p   | 3.96  | 1.98  | 7.94  | 0.0460 |
|                              | hsa-miR-144-5p   | 3.74  | 0.78  | 17.89 | 0.0462 |
|                              | hsa-miR-590-5p   | 1.66  | 0.95  | 2.87  | 0.0465 |
|                              | hsa-miR-16-5p    | 3.38  | 1.26  | 9.08  | 0.0483 |
|                              | hsa-miR-10b-3p   | 1.86  | 0.48  | 7.19  | 0.0493 |
| 20 WG                        | hsa-miR-518f-3p  | 3.72  | 1.57  | 8.83  | 0.0041 |
|                              | hsa-miR-302c-3p  | 2.61  | 1.08  | 6.30  | 0.0051 |
|                              | hsa-miR-330-5p   | 5.48  | 2.55  | 11.77 | 0.0074 |
|                              | hsa-miR-628-5p   | 3.45  | 1.94  | 6.13  | 0.0079 |
|                              | hsa-miR-378a-3p  | 2.36  | 1.64  | 3.39  | 0.0212 |
|                              | hsa-miR-512-3p   | 7.22  | 1.67  | 31.23 | 0.0231 |
|                              | hsa-miR-520d-3p  | 4.45  | 2.18  | 9.09  | 0.0235 |
|                              | hsa-miR-142-5p   | 3.59  | 1.55  | 8.33  | 0.0259 |
|                              | hsa-miR-19b-1-5p | 2.87  | 1.62  | 5.08  | 0.0276 |
|                              | hsa-miR-875-5p   | 1.58  | 1.12  | 2.23  | 0.0414 |
|                              | hsa-miR-573      | 1.59  | 1.01  | 2.51  | 0.0468 |
| PE-Diagnosis /<br>Severe PE* | hsa-miR-532-5p   | 0.07  | 0.01  | 0.53  | 0.0001 |
|                              | hsa-miR-151a-5p  | 7.27  | 5.13  | 10.31 | 0.0006 |
|                              | hsa-miR-106b-3p  | 26.11 | 15.36 | 44.41 | 0.0035 |
|                              | hsa-miR-151a-3p  | 3.79  | 2.55  | 5.64  | 0.0046 |
|                              | hsa-miR-141-3p   | 0.14  | 0.01  | 3.68  | 0.0061 |
|                              | hsa-miR-192-3p   | 9.95  | 5.45  | 18.16 | 0.0101 |
|                              | hsa-miR-30d-5p   | 3.19  | 2.40  | 4.23  | 0.0118 |
|                              | hsa-miR-191-5p   | 2.75  | 1.82  | 4.16  | 0.0139 |
|                              | hsa-miR-28-5p    | 3.29  | 2.00  | 5.42  | 0.0140 |
|                              | hsa-miR-30a-5p   | 2.88  | 2.03  | 4.09  | 0.0194 |
|                              | hsa-miR-30e-3p   | 4.89  | 2.97  | 8.07  | 0.0218 |
|                              | hsa-miR-505-5p   | 2.34  | 1.40  | 3.92  | 0.0225 |
|                              | hsa-miR-340-3p   | 11.20 | 4.07  | 30.80 | 0.0272 |
|                              | hsa-miR-18a-5p   | 6.37  | 2.60  | 15.65 | 0.0294 |
|                              | hsa-miR-93-3p    | 4.12  | 2.00  | 8.49  | 0.0330 |
|                              | hsa-miR-183-3p   | 4.76  | 1.64  | 13.78 | 0.0362 |
|                              | hsa-miR-22-5p    | 7.67  | 3.54  | 16.62 | 0.0437 |
|                              | hsa-miR-942-5p   | 7.57  | 4.05  | 14.15 | 0.0446 |
|                              | hsa-miR-409-3p   | 12.18 | 3.41  | 43.47 | 0.0456 |
|                              | hsa-miR-425-3p   | 4.96  | 1.99  | 12.35 | 0.0480 |

\*PE diagnosis, data were obtained considering the Mild PE group as reference.

**Table S3** – Differentially expressed circulating miRNAs between healthy pregnancies and WWD-PE.

| Gestational age | Regulation group | Target           | RQ    | RQ min | RQ max | p-value |
|-----------------|------------------|------------------|-------|--------|--------|---------|
| 12 WG           | Mild             | hsa-miR-628-3p   | 12.01 | 6.93   | 20.79  | 0.0008  |
|                 | Mild             | hsa-miR-769-5p   | 4.99  | 4.49   | 5.55   | 0.0033  |
|                 | Severe           | hsa-miR-365a-3p  | 2.47  | 1.70   | 3.60   | 0.0074  |
|                 | Mild             | hsa-miR-425-5p   | 3.74  | 1.16   | 12.09  | 0.0102  |
|                 | Severe           | hsa-miR-132-3p   | 4.34  | 3.75   | 5.03   | 0.0104  |
|                 | Severe           | hsa-miR-218-5p   | 3.31  | 1.46   | 7.47   | 0.0436  |
| 16 WG           | Mild             | hsa-miR-411-5p   | 9.22  | 7.69   | 11.05  | 0.0095  |
|                 | Severe           | hsa-miR-197-3p   | 0.14  | 0.01   | 1.60   | 0.0099  |
|                 | Mild             | hsa-miR-1260a    | 3.74  | 2.49   | 5.62   | 0.0104  |
|                 | Mild             | hsa-miR-199a-3p  | 3.98  | 2.52   | 6.28   | 0.0107  |
|                 | Severe           | hsa-miR-603      | 0.22  | 0.00   | 16.82  | 0.0110  |
|                 | Severe           | hsa-miR-152-3p   | 8.85  | 3.08   | 25.46  | 0.0113  |
|                 | Severe           | hsa-miR-490-3p   | 26.04 | 10.09  | 67.23  | 0.0119  |
|                 | Severe           | hsa-miR-579-3p   | 17.74 | 16.54  | 19.03  | 0.0121  |
|                 | Mild             | hsa-miR-584-5p   | 5.30  | 3.04   | 9.25   | 0.0199  |
|                 | Mild             | hsa-miR-19b-3p   | 5.71  | 3.41   | 9.57   | 0.0232  |
|                 | Mild             | hsa-miR-195-5p   | 3.00  | 1.60   | 5.62   | 0.0234  |
|                 | Severe           | hsa-miR-34a-3p   | 13.55 | 7.23   | 25.38  | 0.0265  |
|                 | Mild             | hsa-miR-18b-5p   | 2.62  | 1.63   | 4.23   | 0.0296  |
|                 | Mild             | hsa-miR-15b-3p   | 6.31  | 3.30   | 12.07  | 0.0314  |
|                 | Severe           | hsa-miR-1247-5p  | 4.23  | 2.93   | 6.09   | 0.0327  |
|                 | Mild             | hsa-miR-146a-5p  | 5.26  | 2.83   | 9.78   | 0.0337  |
|                 | Mild             | hsa-miR-27b-3p   | 6.55  | 2.98   | 14.41  | 0.0344  |
|                 | Mild             | hsa-miR-24-3p    | 3.46  | 1.86   | 6.42   | 0.0380  |
|                 | Mild             | hsa-miR-133a-3p  | 0.49  | 0.20   | 1.21   | 0.0382  |
|                 | Severe           | hsa-miR-573      | 2.69  | 2.14   | 3.38   | 0.0382  |
|                 | Mild             | hsa-miR-520d-3p  | 92.20 | 35.94  | 236.55 | 0.0403  |
|                 | Mild             | hsa-miR-151a-3p  | 3.90  | 1.27   | 11.92  | 0.0440  |
|                 | Mild             | hsa-miR-16-5p    | 3.95  | 1.65   | 9.51   | 0.0459  |
|                 | Mild             | hsa-miR-601      | 2.78  | 1.63   | 4.75   | 0.0476  |
|                 | Mild             | hsa-miR-664a-3p  | 8.15  | 3.12   | 21.33  | 0.0493  |
| 20 WG           | Severe           | hsa-miR-518f-3p  | 6.43  | 4.05   | 10.22  | 0.0072  |
|                 | Mild             | hsa-miR-330-5p   | 13.83 | 5.65   | 33.86  | 0.0080  |
|                 | Mild             | hsa-miR-19b-1-5p | 4.90  | 2.81   | 8.54   | 0.0104  |
|                 | Mild             | hsa-miR-573      | 2.31  | 1.59   | 3.37   | 0.0173  |
|                 | Severe           | hsa-miR-378a-3p  | 2.84  | 1.61   | 5.01   | 0.0187  |
|                 | Severe           | hsa-miR-302c-3p  | 5.70  | 3.10   | 10.49  | 0.0201  |

---

|        |                 |       |      |       |        |
|--------|-----------------|-------|------|-------|--------|
| Severe | hsa-miR-212-3p  | 0.13  | 0.01 | 2.70  | 0.0256 |
| Severe | hsa-miR-330-5p  | 10.97 | 5.61 | 21.46 | 0.0259 |
| Severe | hsa-miR-410-3p  | 4.49  | 2.83 | 7.14  | 0.0263 |
| Severe | hsa-miR-517a-3p | 2.12  | 1.31 | 3.43  | 0.0268 |
| Severe | hsa-miR-215-5p  | 2.23  | 1.51 | 3.30  | 0.0280 |
| Severe | hsa-miR-365a-3p | 8.03  | 3.68 | 17.53 | 0.0323 |
| Severe | hsa-miR-628-5p  | 2.95  | 1.51 | 5.79  | 0.0334 |
| Mild   | hsa-miR-518f-3p | 5.34  | 1.96 | 14.58 | 0.0351 |
| Severe | hsa-miR-222-3p  | 18.25 | 6.49 | 51.33 | 0.0372 |
| Severe | hsa-miR-142-5p  | 4.30  | 2.00 | 9.21  | 0.0391 |
| Severe | hsa-miR-1290    | 0.35  | 0.09 | 1.35  | 0.0432 |
| Mild   | hsa-miR-520d-3p | 6.37  | 1.66 | 24.49 | 0.0443 |
| Mild   | hsa-miR-603     | 0.40  | 0.25 | 0.66  | 0.0495 |

---

**Supplementary Figure S1 - Signaling pathway analysis.** The heat maps display hierarchical clustering of the targeted pathways at 12 WG (A), 16 WG (B), 20 WG (C), and at the time of the PE diagnosis (D), respectively. Binary values (0: not targeted, 1: targeted) were used during the clustering process
